# Supplementary material for: Criticism by community people and poor workplace communication as risk factors for the mental health of local welfare workers after the Great East Japan Earthquake: A cross-sectional study
Source: PLoS One. 2017 Nov 22;12(11):e0185930. doi: 10.1371/journal.pone.0185930 (PMC5699795; doi:10.1371/journal.pone.0185930)
Supplement: S1 Questionnaire J — (XLSX) [file pone.0185930.s005.xlsx]

## Sheet: 調査票
	性別		男・女			年齢		歳			職員番号
【現在の状況】						（当てはまる項目の数字をまるで囲んでください 例. 1.はい ・ 2.いいえ)
1)現在の世帯人数 ・・・・・・・・・・・・・・・・・・																			1. 一人暮らし ・ 2. 二人 ・ 3. 三人 ・ 4. 四人以上
2)最終学歴 ・・・・・・・・・・・・・・・・・・・・・・・・・・・・・・・																			1.中卒・2.高卒・3.専門学校卒・4.短大卒・5.大卒以上
3)社会福祉協議会で働き始めた時期 ・・・・・・・・・・・・・																						0.震災前 ・ 1.震災後( ヶ月)
(震災後からの方は働いて何カ月目か教えてください。例）1年2カ月の場合は 14ヶ月と記入してください)
4)震災により、自身が職を失った ・・・・・・・・・・・・・・・・・																							1.はい( ) ・ 0.いいえ
		(1.の方は震災前の業種を教えてください 例) 漁業、水産加工業、飲食業、建設業、商店経営、など)
5)自宅の被災状況について ・・・・・・・・・・・・・・・・・・																				5.全壊				4.大規模半壊						3.半壊				2.一部損壊
																				1.ほとんど被害なし								0.被害なし
6)震災の影響による転居の状況について ・・・・・・・・																				2.仮設住宅（民間賃貸借り上げを含む）へ入居した
																				1.上記以外の住宅へ転居した
																				0.転居なし
7)震災により、家族に死者・行方不明者がいる・・・・・・・・・・・・・・・・・・・・・・・・・・・・																															1.はい ・ 0.いいえ
8)震災により、親しい知人に死者・行方不明者がいる ・・・・・・・・・・・・・・・・・・・・・・																															1.はい ・ 0.いいえ
9)地震の揺れや津波、その後の避難などで命の危険を感じた ・・・・・・・・・・・・・・・
										・・・・・・・・・・・・・・							0.全くない ・ 1.あまりない ・ 2.まあまあある ・ 3.大いにある
10)震災後の家計の収入 ・・・・・・・・・・・・・・・・・																	0.全く減ってない ・ 1.まあまあ減った ・ 2.かなり減った
11)仕事が忙しく休養が十分にとれない ・・・・・・・・・・・・・・・・・・・・・・・																	0.全くない ・ 1.あまりない ・ 2.まあまあある ・ 3.大いにある
12)家の事が忙しく休養が十分にとれない ・・・・・・・・・・・・・・・・・・・・																	0.全くない ・ 1.あまりない ・ 2.まあまあある ・ 3.大いにある
13)現在、職場内の人間関係に苦労している ・・・																	0.全くない ・ 1.あまりない ・ 2.まあまあある ・ 3.大いにある
14)現在の仕事にやりがいを感じている ・・・・・・・																	0.全くない ・ 1.あまりない ・ 2.まあまあある ・ 3.大いにある
15)仕事中に住民から非難を受け、精神的につらい思いをしたことがありますか
										・・・・・・・・・・・・・・							0.全くない ・ 1.あまりない ・ 2.まあまあある ・ 3.大いにある
16)地域の復興の進み具合についてどのように感じますか
	・・・・・・・・				0.全く進んでいない ・ 1.あまり進んでいない ・ 2.まあまあ進んでいる ・ 3.大いに進んでいる
【現在の健康状況】
17)自身の健康に不安を感じている・・・・・・・・・・・・・・・・・・・・・・・・・・・・・・・・・・・・・																															1.はい ・ 0.いいえ
18)震災前から治療している病気がある・・・・・・・・・・・・・・・・・・・・・・・・・・・・・・・・・																															1.はい ・ 0.いいえ
19)震災後に新たに治療を始めた病気がある・・・・・・・・・・・・・・・・・・・・・・・・・・・・・																															1.はい ・ 0.いいえ
20)震災前に、メンタルヘルス（こころの不調）に関して治療を受けたことがある・・・																															1.はい ・ 0.いいえ
21)震災後に、メンタルヘルス（こころの不調）に関して相談や受診をしたことがある																															1.はい ・ 0.いいえ
22)震災前と比較した飲酒の量について・・・・・・・																			0.飲まない ・ 1.変わらない・ 2.減った・ 3.増えた
23)家族が健康上の問題をかかえている・・・・・・・・・・・・・・・・・・・・・・・・・・・・・・・・																															1.はい ・ 0.いいえ
【その他】
(１) こころの健康に関して、専門家との個別面談を勤務中に利用出来る機会があれば希望しますか？
								[ 1.希望する ・ 2.どちらでもよい ・ 3.希望しない ]
(２) その他（気になること、疑問点、要望などがあれば記入してください）
